# Supplementary material for: The Effect of Fatty Acids on Ciprofloxacin Cytotoxic Activity in Prostate Cancer Cell Lines—Does Lipid Component Enhance Anticancer Ciprofloxacin Potential?
Source: MDPI journal article supplement (doi:10.3390/cancers14020409), 2022-01-14
Supplement: s1 [file s1]

## Supplementary material:

**Table S1.** LC-MS proteome analysis provided in the cancer PC3 and normal RWPE-1 cells treated for 72h with IC<sub>50</sub> concentrations of CP amides **2**, **4**, **5** and **8** and free CP. Protein intensities were expressed as a mean from three independent experiments.

| Accession                     | Name of enzyme                                                                         | PC3     |           |           |           |          |          | RWPE-1  |          |          |          |          |          |
|-------------------------------|----------------------------------------------------------------------------------------|---------|-----------|-----------|-----------|----------|----------|---------|----------|----------|----------|----------|----------|
|                               |                                                                                        | Control | 2         | 4         | 5         | 8        | CP       | Control | 2        | 4        | 5        | 8        | CP       |
| Lipid transport and signaling |                                                                                        |         |           |           |           |          |          |         |          |          |          |          |          |
| FABP5_HUMAN                   | Fatty acid-binding protein 5 OS=Homo sapiens OX=9606 GN=FABP5 PE=1 SV=3                | 2099906 | 550175.4  | 1276742.1 | 1866816.4 | 2133639  | 1940313  | -       | -        | -        | -        | -        | -        |
| AT8A1_HUMAN                   | Phospholipid-transporting ATPase 1A OS=Homo sapiens OX=9606 GN=ATP8A1 PE=1 SV=1        | 115840  | 164724.5  | 286124.8  | 363621.8  | 289020.8 | 144220.8 | 98750   | 109810   | 107933.7 | 113068.7 | 106235   | 119685   |
| NPC2_HUMAN                    | NPC intracellular cholesterol transporter 2 OS=Homo sapiens OX=9606 GN=NPC2 PE=1 SV=1  | 90108   | 165978    | 84070.8   | 62625.1   | 118672.2 | 82268.6  | 60306   | 55903.6  | 59220.5  | 57109.8  | 56989.2  | 54999.1  |
| CAV1_HUMAN                    | Caveolin-1 OS=Homo sapiens OX=9606 GN=CAV1 PE=1 SV=4                                   | 725820  | 684448.3  | 625656.8  | 428959.6  | 825983.2 | 647431.4 | 64740   | 61373.5  | 56388.6  | 55223.2  | 53539    | 59884.5  |
| Lipid anabolism and storage   |                                                                                        |         |           |           |           |          |          |         |          |          |          |          |          |
| FAS_HUMAN                     | Fatty acid synthase OS=Homo sapiens OX=9606 GN=FASN PE=1 SV=3                          | 1125936 | 1138321.3 | 541575.2  | 271350.6  | 702584.1 | 984068.1 | 823421  | 1005397  | 935406.2 | 976577.3 | 877766.8 | 778132.9 |
| ACACB_HUMAN                   | Acetyl-CoA carboxylase 2 OS=Homo sapiens OX=9606 GN=ACACB PE=1 SV=3                    | 253760  | 223816.3  | 54304.6   | 57857.3   | 143374.4 | 226607.7 | 49340   | 44109    | 47563.7  | 45866.2  | 41396.3  | 44060.6  |
| PLIN3_HUMAN                   | Perilipin-3 OS=Homo sapiens OX=9606 GN=PLIN3 PE=1 SV=3                                 | 960327  | 722165    | 778825.2  | 410059.6  | 875818.2 | 828762.2 | 631231  | 664055   | 715815   | 733490.4 | 835118.6 | 600932   |
| Lipid catabolism              |                                                                                        |         |           |           |           |          |          |         |          |          |          |          |          |
| DECR_HUMAN                    | 2,4-dienoyl-CoA reductase, mitochondrial OS=Homo sapiens OX=9606 GN=DECR1 PE=1 SV=1    | 192442  | 68317     | 99492.5   | 123932.6  | 162998.4 | 159149.5 | 111503  | 101802.2 | 103140.3 | 121761.3 | 114179.1 | 107377.4 |
| THIL_HUMAN                    | Acetyl-CoA acetyltransferase, mitochondrial OS=Homo sapiens OX=9606 GN=ACAT1 PE=1 SV=1 | 79046   | 42843     | 56280.7   | 40787.7   | 94143.8  | 65924.4  | 69548   | 85822.2  | 92012    | 35886.8  | 82831.7  | 58003    |
